# Supplementary material
Source: PubMed Central journal article supplement (PMC3666212)
Supplement: bi400066a_si_001.pdf [file bi400066a_si_001.pdf]

**Supporting Table 1. Data collection and refinement statistics.**

|                                                       | LT<br>PKAc-Mg <sub>2</sub> ADP-pSP20                  | RT<br>PKAc-Mg <sub>2</sub> ADP-pSP20                  | LT<br>PKAc-Ca <sub>2</sub> ADP-pSP20                  | LT<br>PKAc-Sr <sub>2</sub> ADP-pSP20                  | RT<br>PKAc-Sr <sub>2</sub> ADP-pSP20                  | LT<br>PKAc-Ba <sub>2</sub> ADP-pSP20                  |
|-------------------------------------------------------|-------------------------------------------------------|-------------------------------------------------------|-------------------------------------------------------|-------------------------------------------------------|-------------------------------------------------------|-------------------------------------------------------|
| PDB ID                                                | 4IAD                                                  | 4IAF                                                  |                                                       |                                                       |                                                       |                                                       |
| <b>Data collection</b>                                |                                                       |                                                       |                                                       |                                                       |                                                       |                                                       |
| Space group                                           | <i>P</i> 2 <sub>1</sub> 2 <sub>1</sub> 2 <sub>1</sub> |
| Cell dimensions<br><i>a</i> , <i>b</i> , <i>c</i> (Å) | 57.522, 79.535,<br>97.914                             | 59.213, 79.901,<br>99.637                             | 57.808, 79.654,<br>98.356                             | 56.537, 78.924,<br>97.331                             | 59.484, 80.014,<br>100.177                            | 58.288, 79.648,<br>98.709                             |
| $\alpha$ , $\beta$ , $\gamma$ (°)                     | 90, 90, 90                                            | 90, 90, 90                                            | 90, 90, 90                                            | 90, 90, 90                                            | 90, 90, 90                                            | 90, 90, 90                                            |
| Resolution (Å)                                        | 40.00 (1.90) *                                        | 40.00 (2.20)                                          | 40.00 (1.55)                                          | 40.00 (1.60)                                          | 40.00 (2.00)                                          | 40.00 (1.85)                                          |
| <i>R</i> <sub>sym</sub> or <i>R</i> <sub>merge</sub>  | 0.038 (0.352)                                         | 0.086 (0.464)                                         | 0.027 (0.354)                                         | 0.029 (0.488)                                         | 0.072 (0.409)                                         | 0.064 (0.480)                                         |
| <i>I</i> / $\sigma$ <i>I</i>                          | 54.0 (5.5)                                            | 14.9 (2.4)                                            | 48.0 (2.7)                                            | 53.3 (2.7)                                            | 15.2 (2.4)                                            | 16.2 (2.0)                                            |
| Completeness (%)                                      | 96.0 (87.1)                                           | 97.0 (93.7)                                           | 97.3 (75.8)                                           | 99.6 (96.5)                                           | 95.3 (88.4)                                           | 97.4 (95.0)                                           |
| Redundancy                                            | 7.9 (7.4)                                             | 4.0 (3.9)                                             | 5.5 (3.4)                                             | 5.7 (4.6)                                             | 3.9 (3.6)                                             | 3.7 (3.6)                                             |
| <b>Refinement</b>                                     |                                                       |                                                       |                                                       |                                                       |                                                       |                                                       |
| Resolution (Å)                                        | 20.00-1.90                                            | 20.00-2.20                                            | 20.00-1.55                                            | 20.00-1.60                                            | 20.00-2.00                                            | 20.00-1.85                                            |
| No. reflections                                       | 34466                                                 | 18612                                                 | 62900                                                 | 55292                                                 | 28271                                                 | 34206                                                 |
| <i>R</i> <sub>work</sub> / <i>R</i> <sub>free</sub>   | 0.185 / 0.238                                         | 0.160 / 0.192                                         | 0.169 / 0.209                                         | 0.183 / 0.222                                         | 0.180 / 0.227                                         | 0.199 / 0.249                                         |
| No. atoms                                             |                                                       |                                                       |                                                       |                                                       |                                                       |                                                       |
| Protein                                               | 2787                                                  | 2781                                                  | 2819                                                  | 2844                                                  | 2781                                                  | 2793                                                  |
| Ligand/ion                                            | 29                                                    | 29                                                    | 29                                                    | 29                                                    | 29                                                    | 29                                                    |
| Peptide                                               | 159                                                   | 159                                                   | 159                                                   | 159                                                   | 159                                                   | 159                                                   |
| Water                                                 | 288                                                   | 260                                                   | 395                                                   | 284                                                   | 196                                                   | 255                                                   |
| <i>B</i> -factors                                     |                                                       |                                                       |                                                       |                                                       |                                                       |                                                       |
| Protein                                               | 25.9                                                  | 30.4                                                  | 22.1                                                  | 25.0                                                  | 34.4                                                  | 25.6                                                  |
| Ligand/ion                                            | 18.3                                                  | 21.0                                                  | 14.1                                                  | 17.0                                                  | 23.5                                                  | 21.9                                                  |
| Peptide                                               | 29.3                                                  | 29.7                                                  | 20.0                                                  | 22.0                                                  | 35.2                                                  | 28.0                                                  |
| Water                                                 | 32.4                                                  | 42.3                                                  | 32.0                                                  | 32.1                                                  | 37.0                                                  | 31.6                                                  |
| R.m.s. deviations                                     |                                                       |                                                       |                                                       |                                                       |                                                       |                                                       |
| Bond lengths (Å)                                      | 0.012                                                 | 0.004                                                 | 0.010                                                 | 0.008                                                 | 0.015                                                 | 0.022                                                 |
| Bond angles (°)                                       | 1.340                                                 | 1.140                                                 | 1.340                                                 | 1.310                                                 | 1.420                                                 | 1.450                                                 |

\*For each structure one crystal was used to collect the dataset. \*Values in parentheses are for highest-resolution shell.

**Supporting Table 1. Data collection and refinement statistics. (contd.)**

|                                                      |                                                       |
|------------------------------------------------------|-------------------------------------------------------|
|                                                      | LT                                                    |
|                                                      | PKAc-Mg <sub>2</sub> AMPPCP-SP20                      |
| PDB ID                                               | 4IAC                                                  |
| <b>Data collection</b>                               |                                                       |
| Space group                                          | <i>P</i> 2 <sub>1</sub> 2 <sub>1</sub> 2 <sub>1</sub> |
| Cell dimensions                                      |                                                       |
| <i>a</i> , <i>b</i> , <i>c</i> (Å)                   | 56.809, 79.678, 97.954                                |
| $\alpha$ , $\beta$ , $\gamma$ (°)                    | 90, 90, 90                                            |
| Resolution (Å)                                       | 40.00 (2.15)                                          |
| <i>R</i> <sub>sym</sub> or <i>R</i> <sub>merge</sub> | 0.075 (0.441)                                         |
| <i>I</i> / $\sigma$ <i>I</i>                         | 28.0 (4.2)                                            |
| Completeness (%)                                     | 99.3 (98.3)                                           |
| Redundancy                                           | 7.5 (6.9)                                             |
| <b>Refinement</b>                                    |                                                       |
| Resolution (Å)                                       | 20.00-2.15                                            |
| No. reflections                                      | 21951                                                 |
| <i>R</i> <sub>work</sub> / <i>R</i> <sub>free</sub>  | 0.181 / 0.212                                         |
| No. atoms                                            |                                                       |
| Protein                                              | 2781                                                  |
| Ligand/ion                                           | 33                                                    |
| Peptide                                              | 155                                                   |
| Water                                                | 375                                                   |
| <i>B</i> -factors                                    |                                                       |
| Protein                                              | 20.8                                                  |
| Ligand/ion                                           | 14.8                                                  |
| Peptide                                              | 18.1                                                  |
| Water                                                | 33.3                                                  |
| R.m.s. deviations                                    |                                                       |
| Bond lengths (Å)                                     | 0.005                                                 |
| Bond angles (°)                                      | 1.165                                                 |

\* For each structure one crystal was used to collect the dataset. \*Values in parentheses are for highest-resolution shell.

**Supporting Table 2. Coordination distances around M1 and M2 sites in complexes with excess Mg<sup>2+</sup>, Ca<sup>2+</sup>, Sr<sup>2+</sup> and Ba<sup>2+</sup>.**

Distance values are given in Å; Ions are in order of increase of ionic radius.

| <b>M1 site</b>                        | <b>Mg<sup>2+</sup></b> | <b>Ca<sup>2+</sup></b> | <b>Sr<sup>2+</sup></b> | <b>Ba<sup>2+</sup></b> | <b>M2 site</b>                        | <b>Mg<sup>2+</sup></b> | <b>Ca<sup>2+</sup></b> | <b>Sr<sup>2+</sup></b> | <b>Ba<sup>2+</sup></b> |
|---------------------------------------|------------------------|------------------------|------------------------|------------------------|---------------------------------------|------------------------|------------------------|------------------------|------------------------|
| ionic radii, Å*                       | 0.72                   | 1.06                   | 1.26                   | 1.42                   | ionic radii, Å*                       | 0.72                   | 1.06                   | 1.26                   | 1.42                   |
| O <sub>2</sub> (P <sub>α</sub> )      |                        |                        |                        |                        | O <sub>2</sub> (P <sub>α</sub> )      | 2.0                    | 2.3                    | 2.4                    | 2.5                    |
| O <sub>1</sub> (P <sub>β</sub> )      | 2.0                    | 2.3                    | 2.3                    | 2.4                    | O <sub>1</sub> (P <sub>β</sub> )      |                        |                        |                        |                        |
| O <sub>3</sub> (P <sub>β</sub> )      |                        |                        |                        |                        | O <sub>3</sub> (P <sub>β</sub> )      | 2.0                    | 2.3                    | 2.6                    | 2.2                    |
| O <sub>23</sub> (pSer <sub>21</sub> ) | 2.0                    | 2.3                    | 2.4                    | 2.7                    | O <sub>23</sub> (pSer <sub>21</sub> ) |                        |                        |                        |                        |
| O <sub>1</sub> Asp <sub>184</sub>     | 2.3                    | 2.4                    | 2.6                    | 2.9                    | O <sub>1</sub> Asp <sub>184</sub>     |                        |                        |                        |                        |
| O <sub>2</sub> Asp <sub>184</sub>     | 2.3                    | 2.5                    | 2.6                    | 2.7                    | O <sub>2</sub> Asp <sub>184</sub>     | 2.0                    | 2.4                    | 2.5                    | 2.7                    |
| O <sub>1</sub> Asn <sub>171</sub>     |                        |                        |                        |                        | O <sub>1</sub> Asn <sub>171</sub>     | 2.0                    | 2.4                    | 2.6                    | 2.9                    |
| H <sub>2</sub> O(1)                   | 2.2                    | 2.5                    | 2.5                    | 2.8                    | H <sub>2</sub> O(5)                   | 2.4                    | 2.4                    | 2.5                    | 2.8                    |
| H <sub>2</sub> O(2)                   | 2.1                    | 2.4                    | 2.5                    | 2.8                    | H <sub>2</sub> O(6)                   |                        | 2.6                    | 2.7                    | 3.1                    |
| H <sub>2</sub> O(3)                   |                        | 2.4                    | 2.5                    | 2.8                    | H <sub>2</sub> O(7)                   | 2.2                    | 2.5                    | 2.6                    | 2.9                    |
| H <sub>2</sub> O(4)                   |                        |                        | 2.6                    | 2.9                    |                                       |                        |                        |                        |                        |
| Coordination number                   | 6                      | 7                      | 8                      | 8                      | Coordination number                   | 6                      | 7                      | 7                      | 7                      |

\* Metal ionic radius is dependent on the number of ligands the cation is coordinated to.

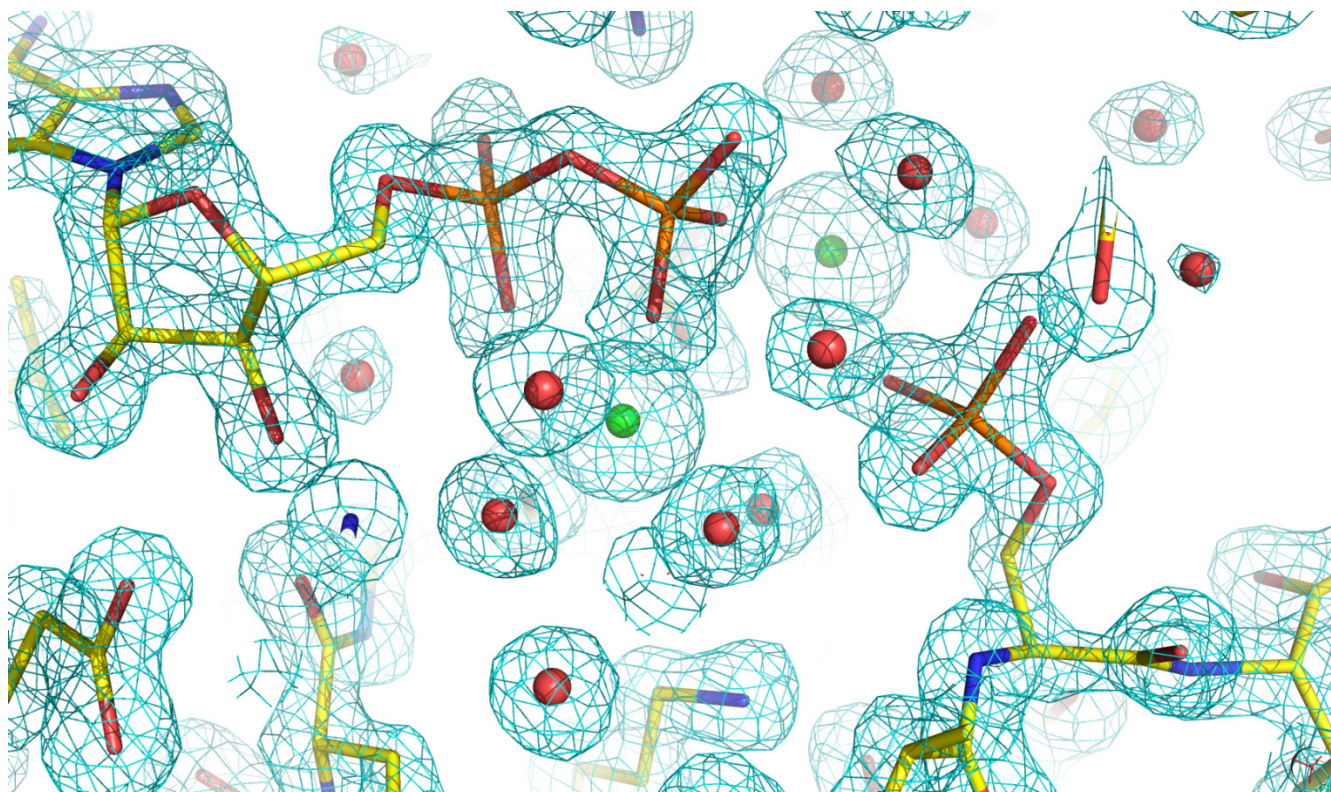

**Supporting Figure 1a.** The  $2F_o - F_c$  electron density map of the active site in PKAc-Sr<sub>2</sub>ADP-pSP20 contoured at  $2\sigma$  level.

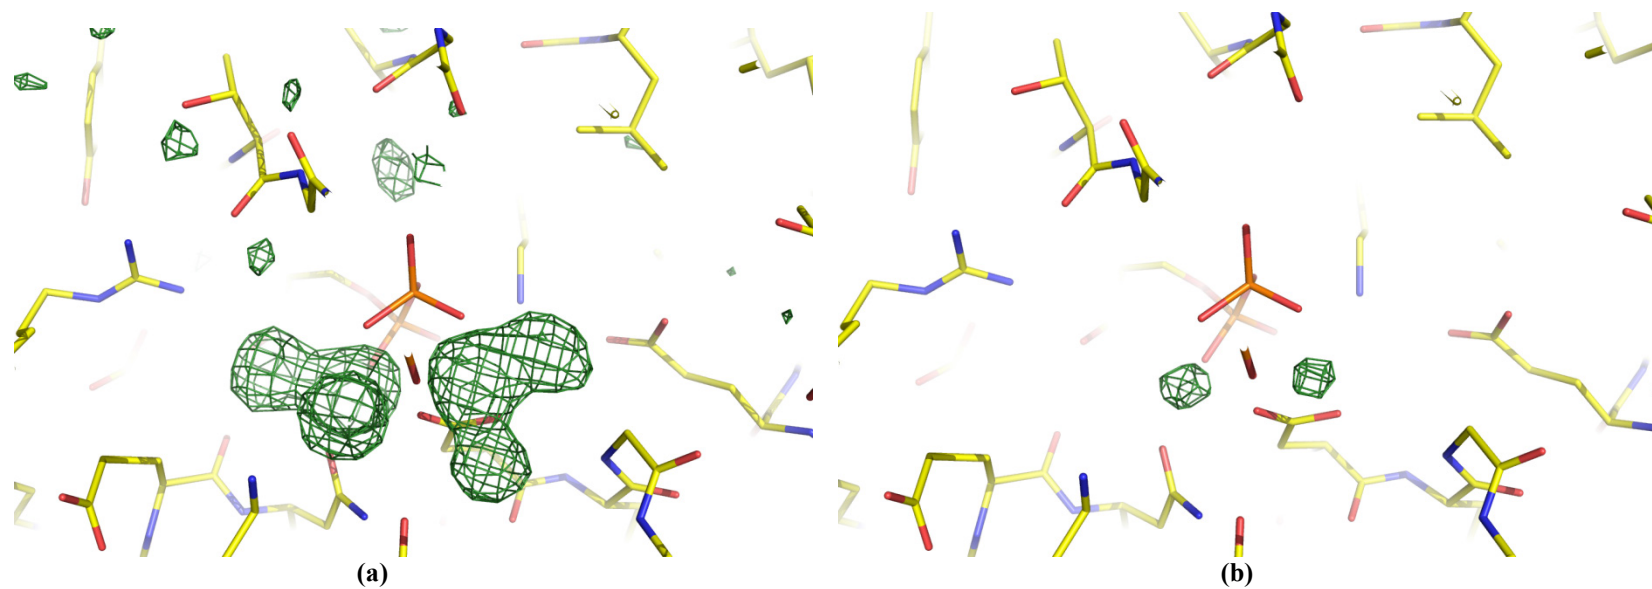

**Supporting Figure 2.** The omit  $F_O-F_C$  electron density map showing the locations of the metal ions and metal-bound water molecules. (a) in PKAc-Mg<sub>2</sub>ADP-pSP20 at 3  $\sigma$  level and (b) at 13  $\sigma$  level.

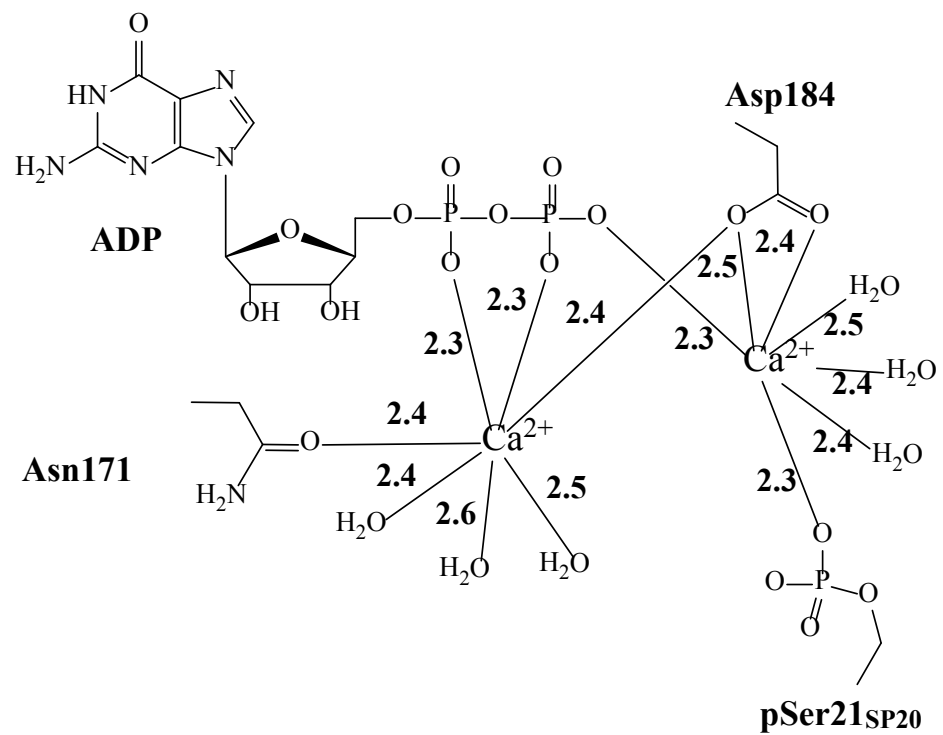

**Supporting Figure 3a.** Chemical diagram of the metal coordination in PKAc-Ca<sub>2</sub>ADP-pSP20. Distances are in Å.

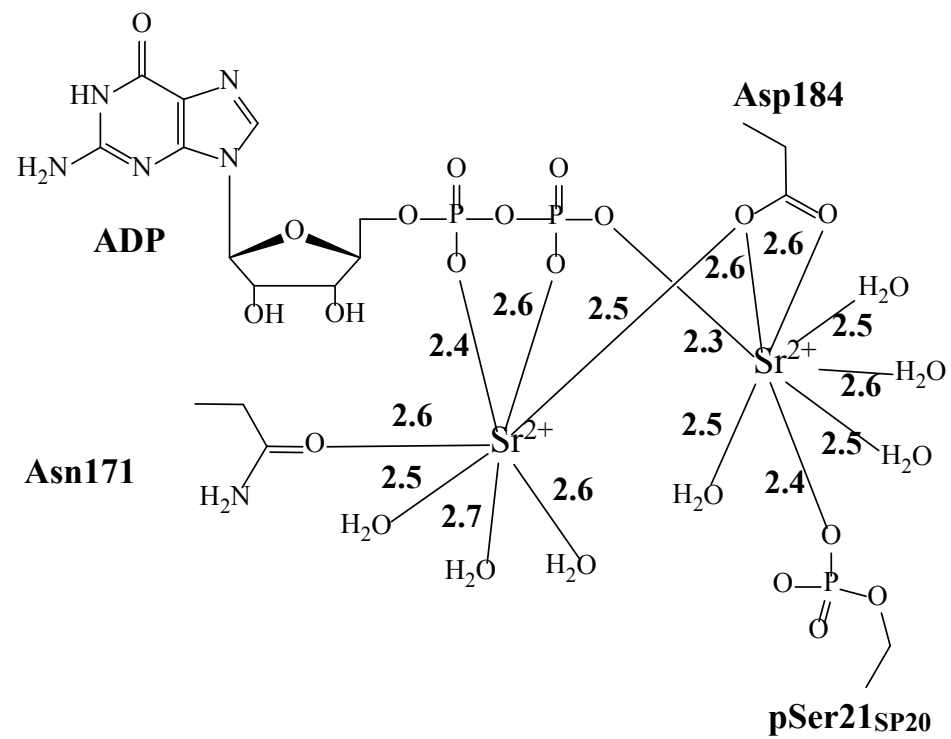

**Supporting Figure 3b.** Chemical diagram of the metal coordination in PKAc-Sr<sub>2</sub>ADP-pSP20. Distances are in Å.

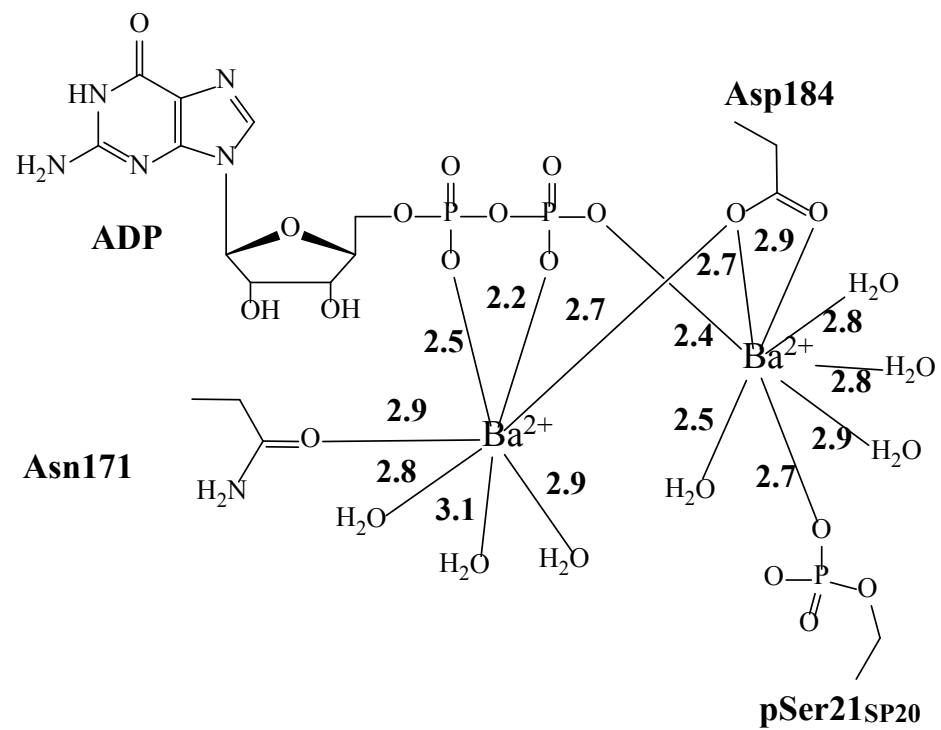

**Supporting Figure 3c.** Chemical diagram of the metal coordination in PKAc- $\text{Ba}_2\text{ADP}$ -pSP20. Distances are in Å.



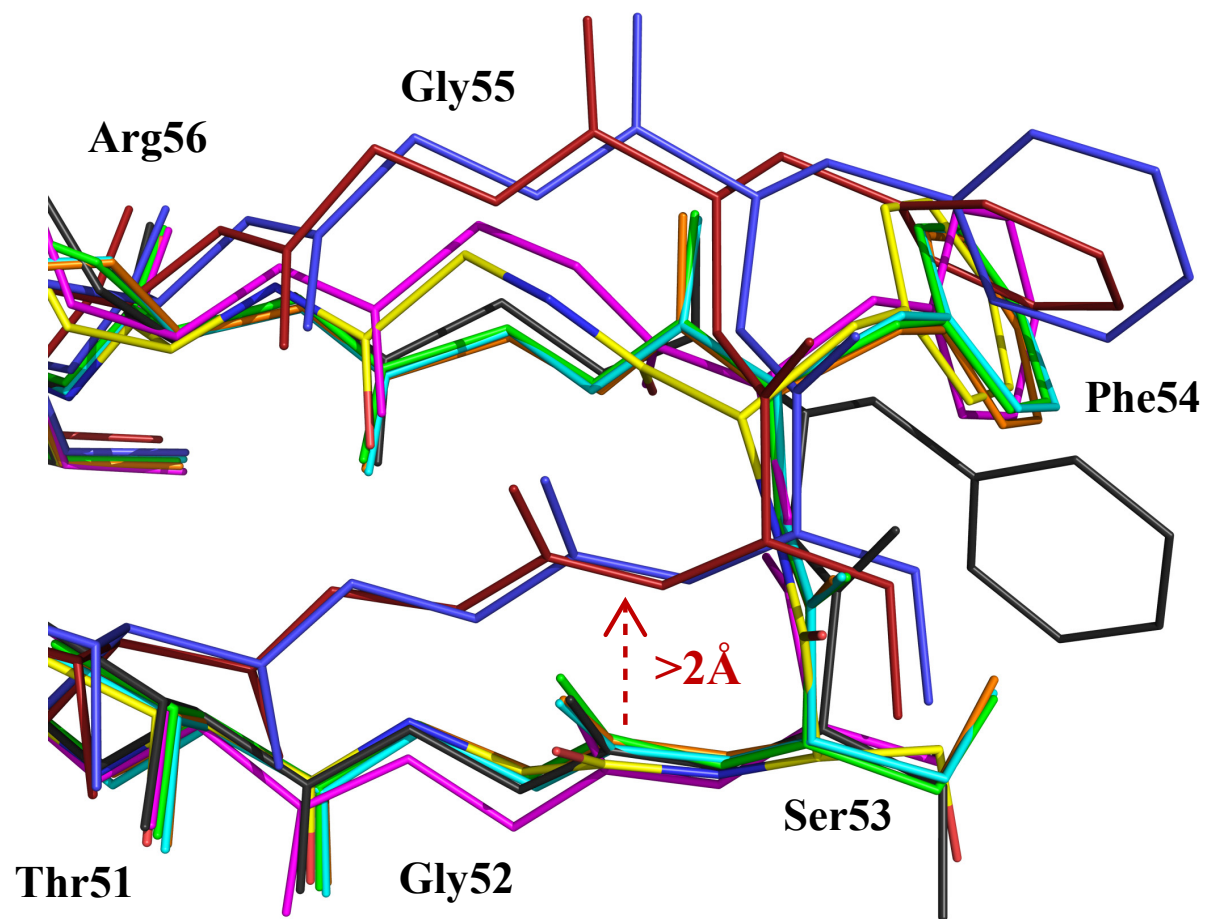

**Supporting Figure 4.** The superposition of glycine-rich loops in the low-temperature structures reported in this study.
